# Supplementary material for: Double nucleophilic addition to iminomalonate, leading to the synthesis of quaternary α-amino diesters and desymmetrization of the products
Source: Royal Society of Chemistry journal article supplement (doi:10.1039/c9ra04889h), 2019-01-01

## Supporting Information

### Double nucleophilic addition to iminomalonate, leading to the synthesis of quaternary $\alpha$ -amino diesters and desymmetrization of the products

**Makoto Shimizu,<sup>\*a,b</sup> Miki Mushika,<sup>b</sup> Isao Mizota,<sup>b</sup> and Yusong Zhu<sup>a</sup>**

<sup>a</sup>*School of Energy Science and Engineering, Nanjing Tech University, Nanjing 211816, Jiangsu Province, China*

<sup>b</sup>*Department of Chemistry for Materials, Graduate School of Engineering, Mie University, Tsu, Mie 514-8507, Japan*

Copies of <sup>1</sup>H and <sup>13</sup>C NMR Spectra-----S2-S17

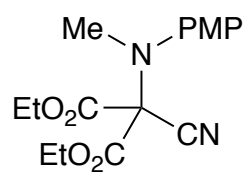

3

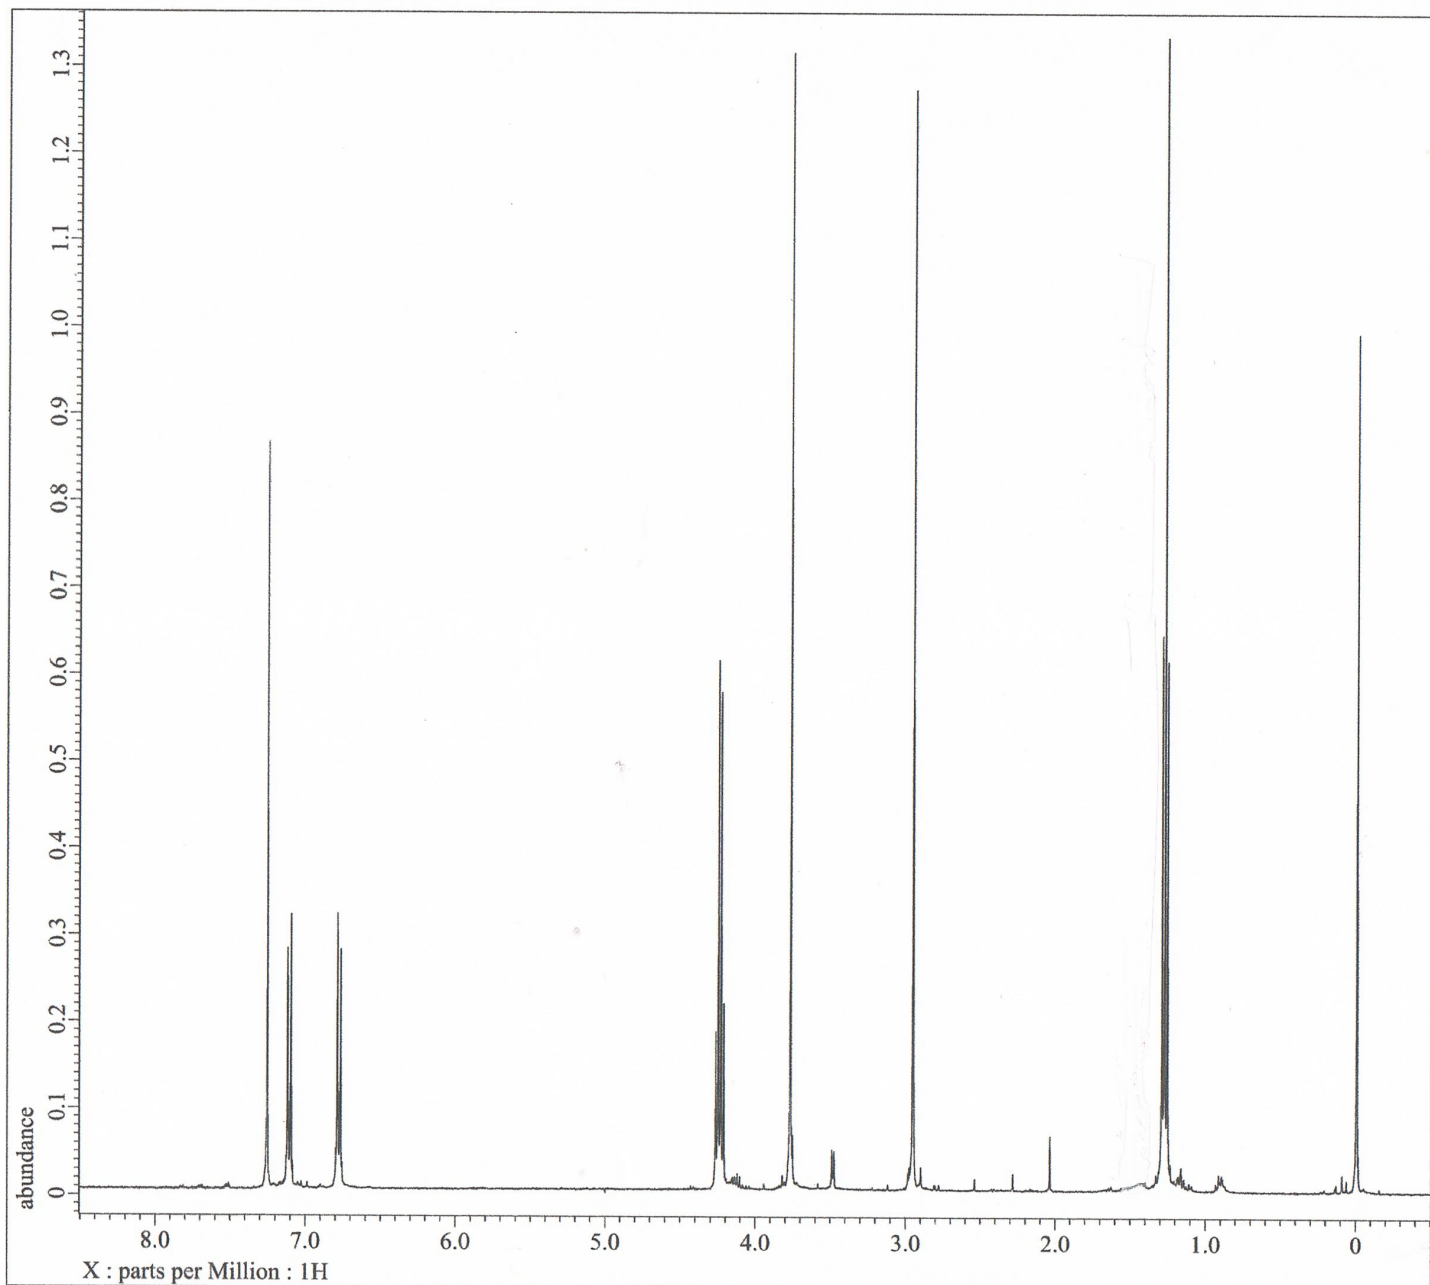

2

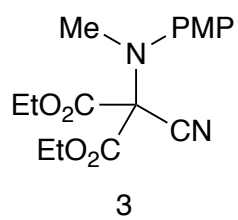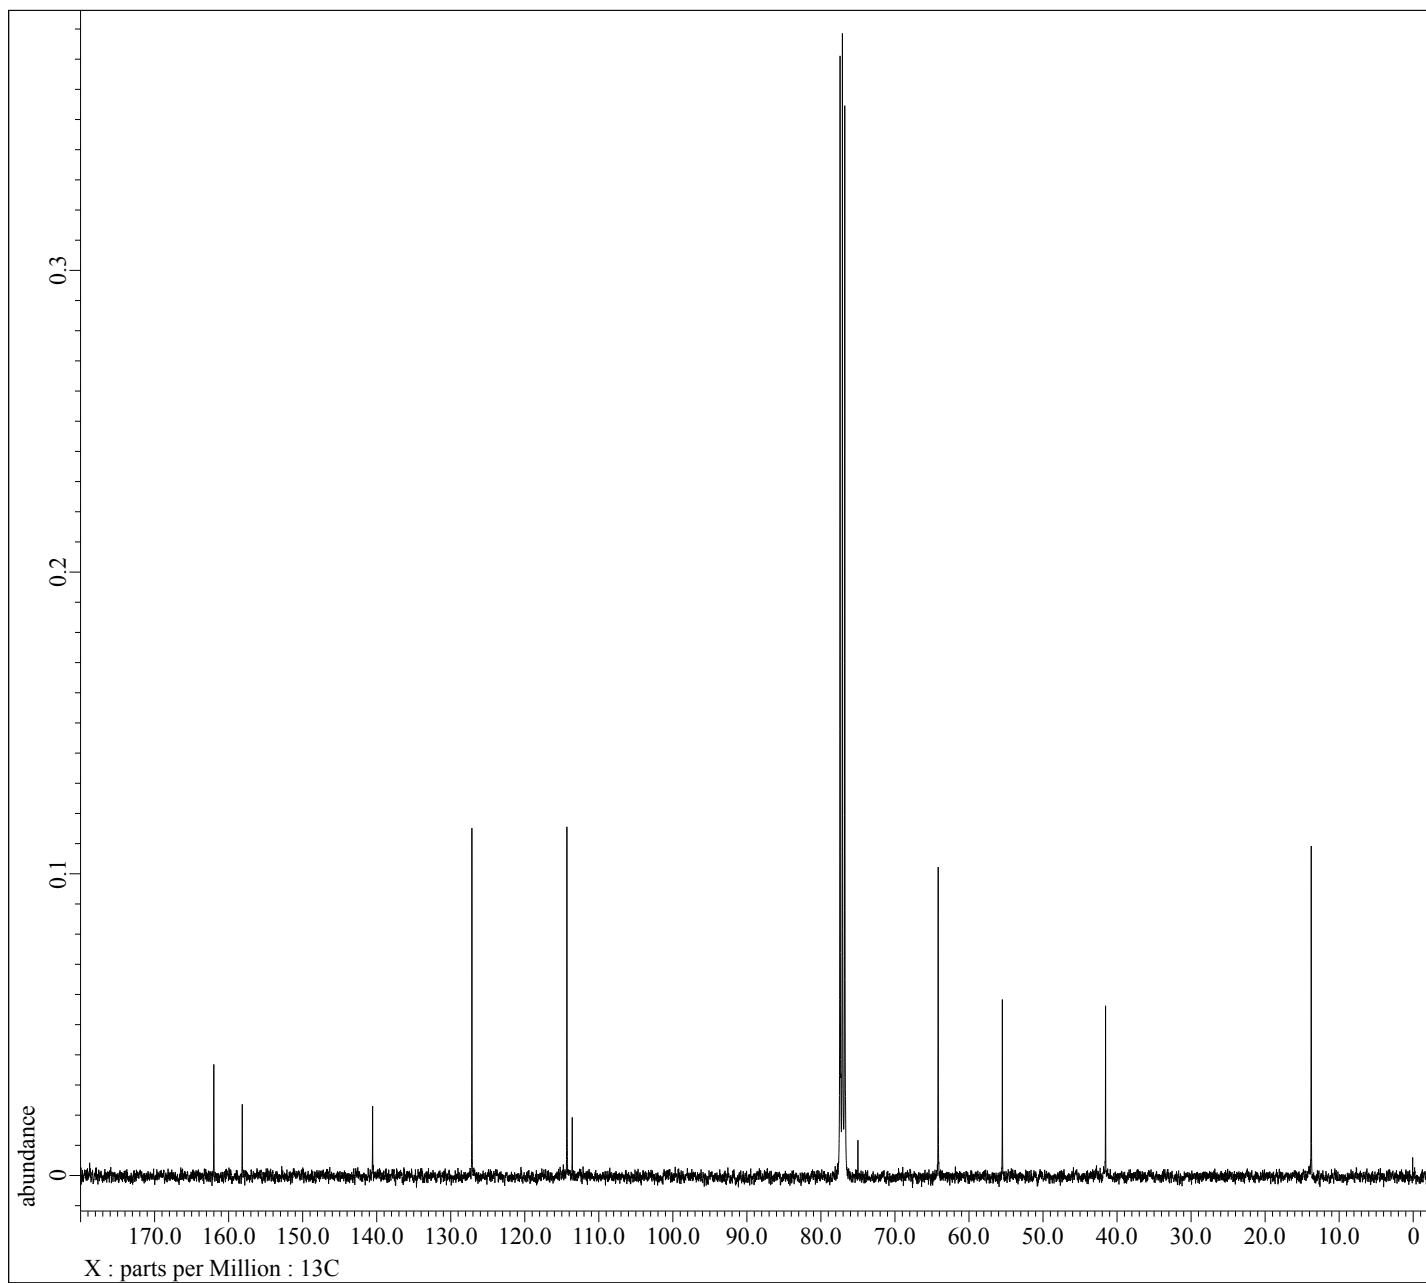

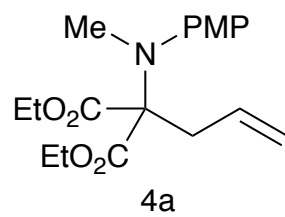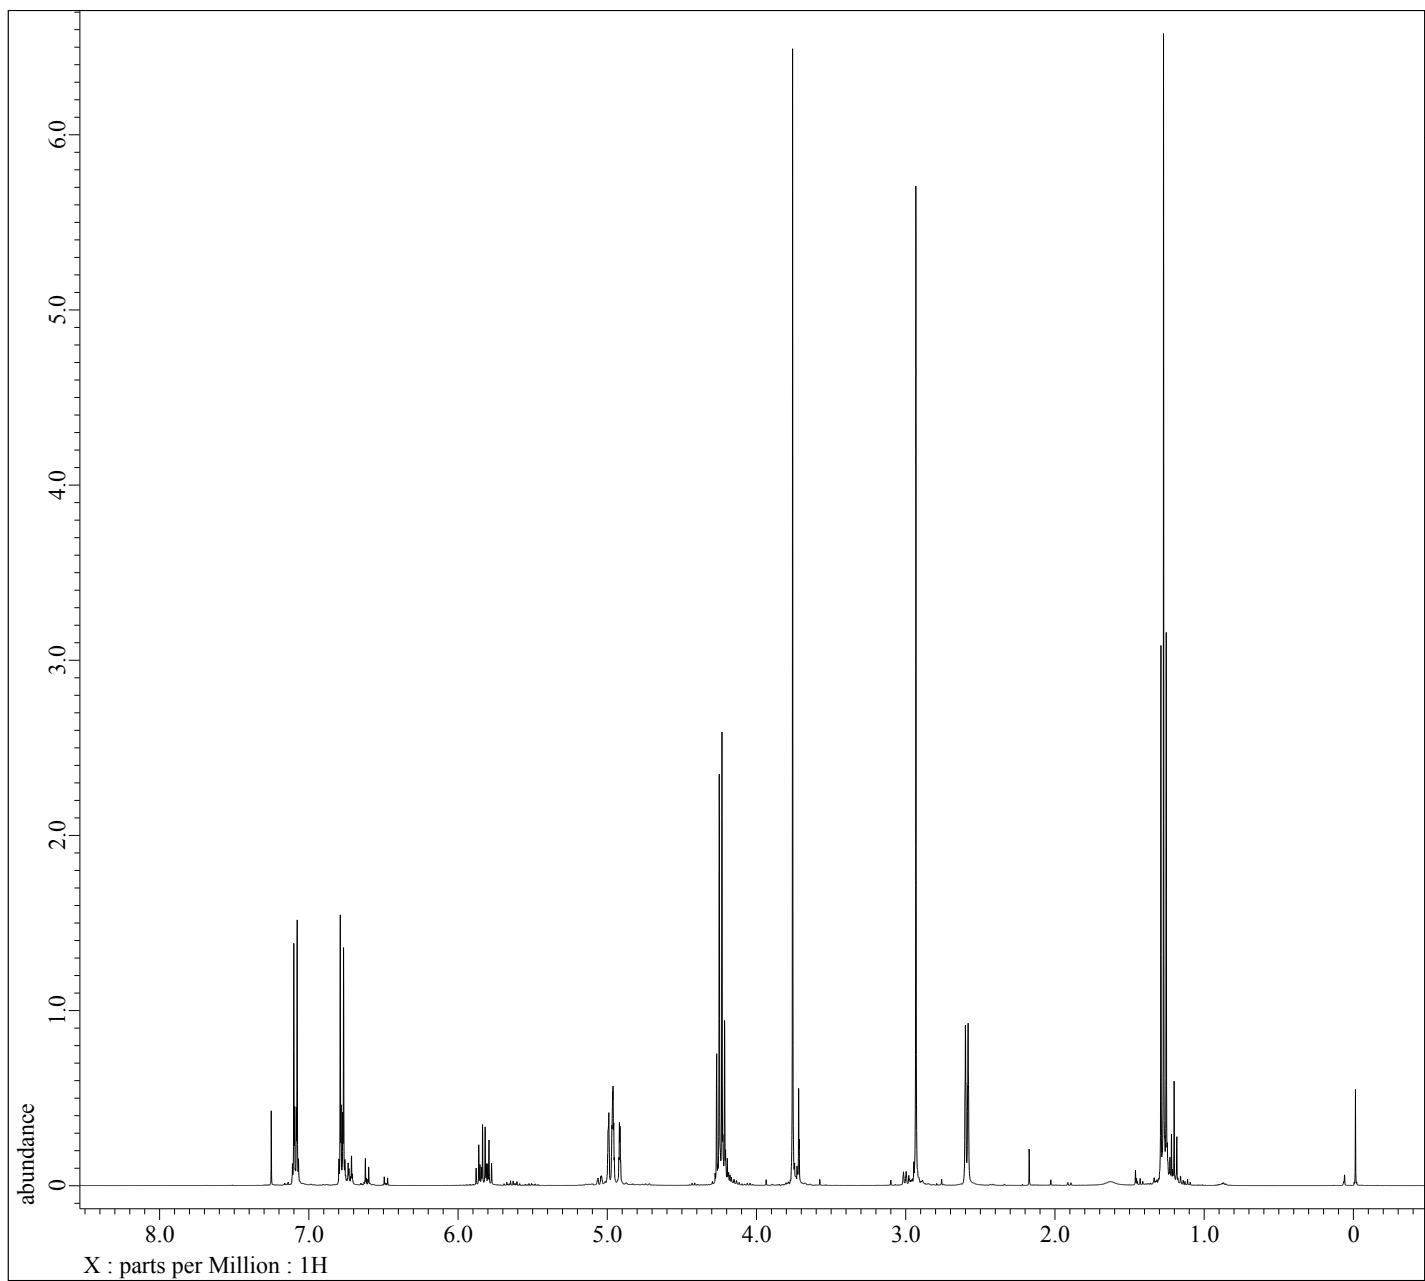

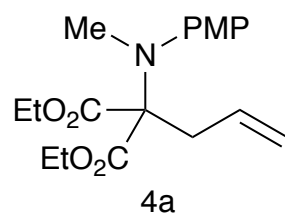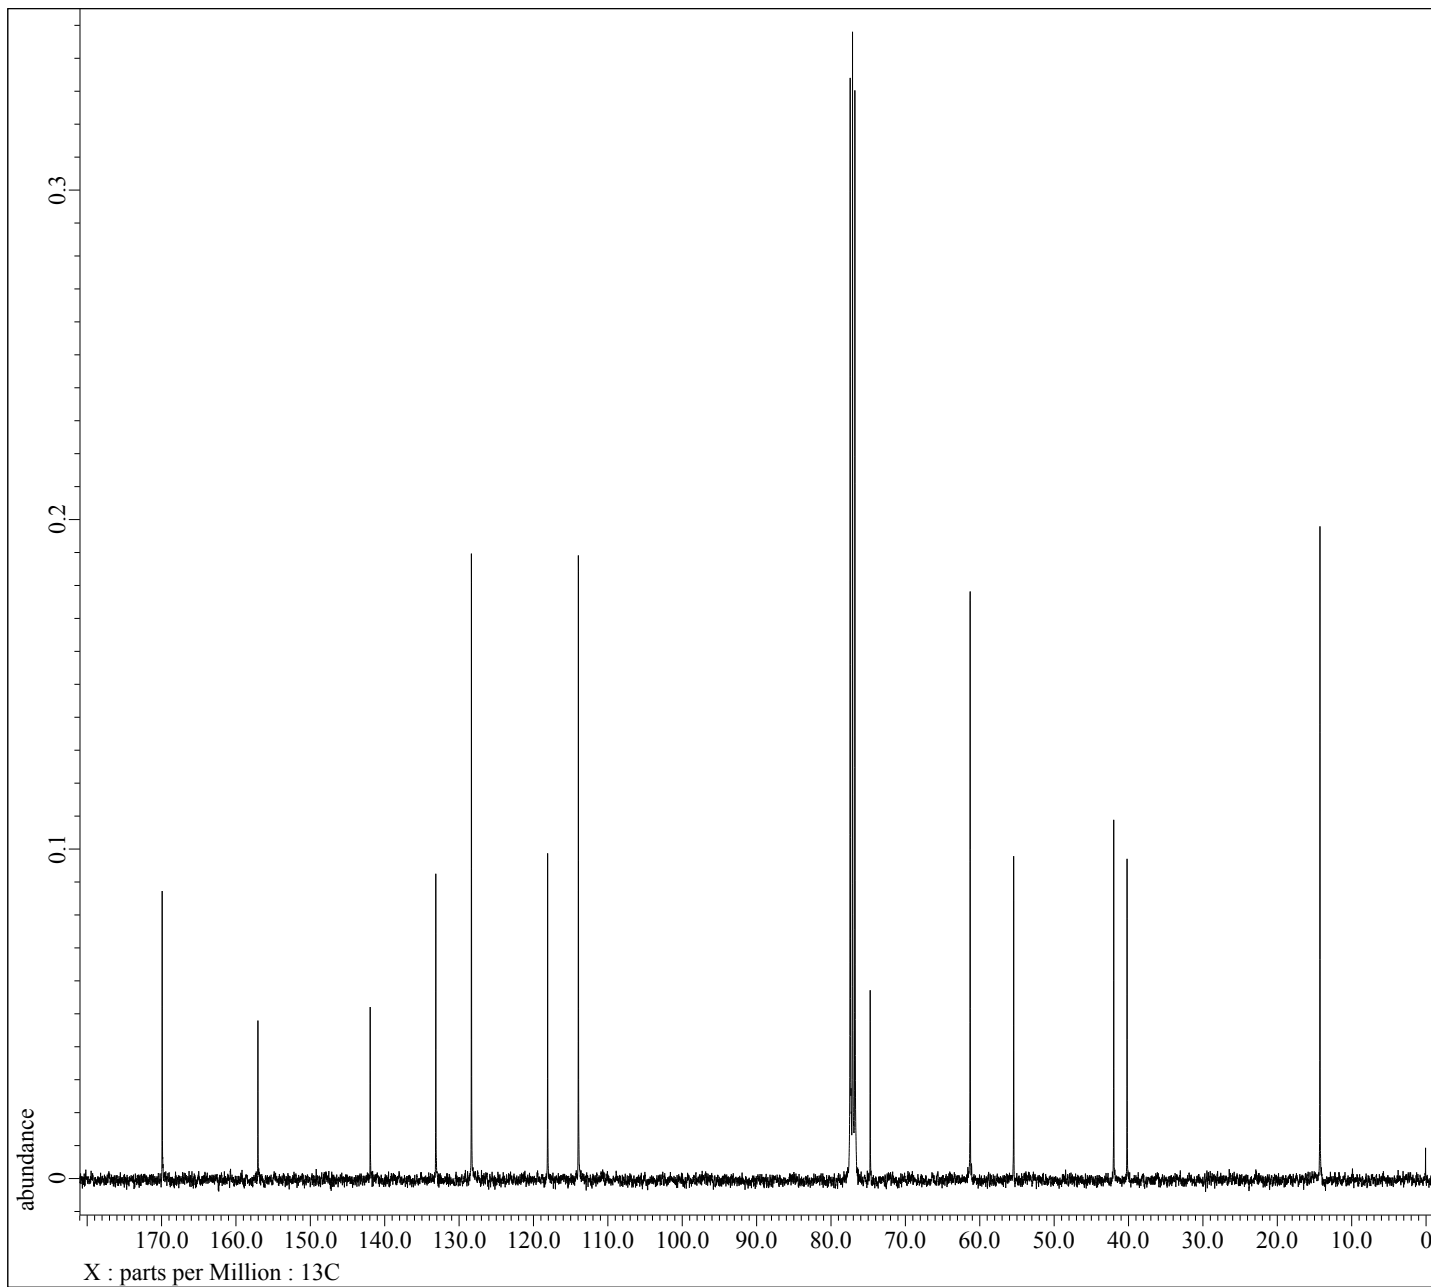

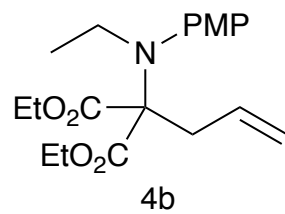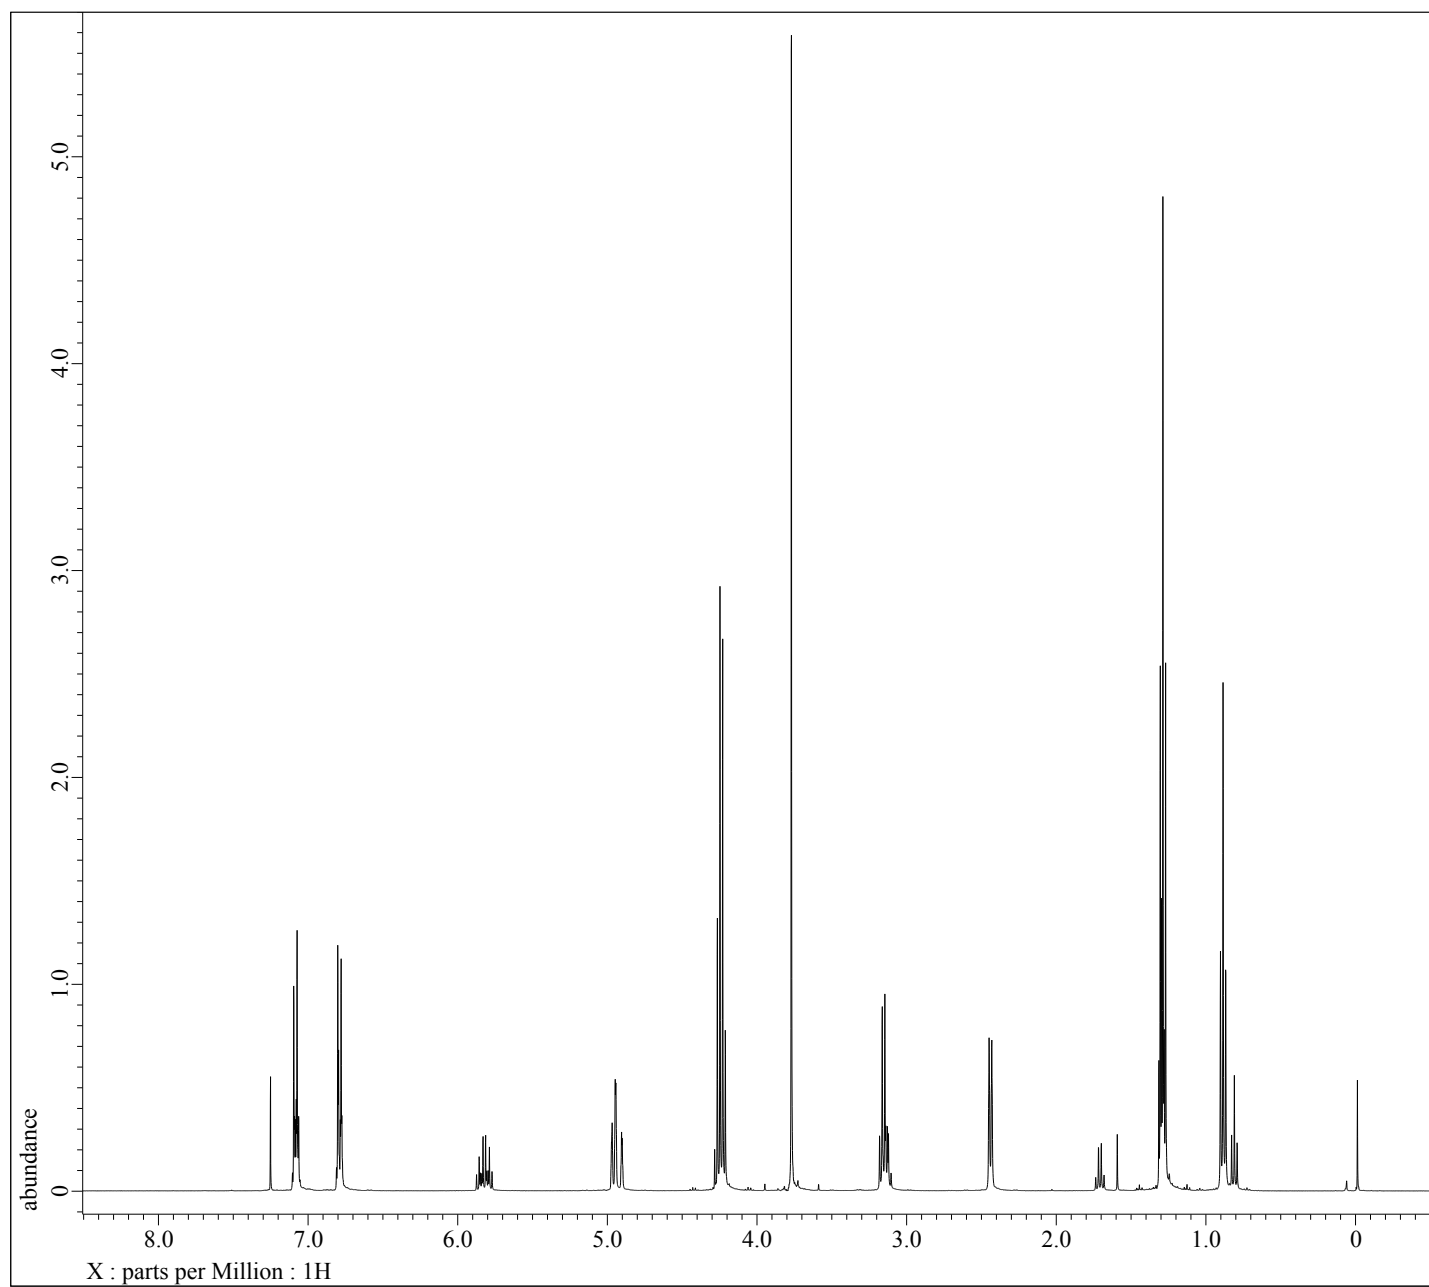

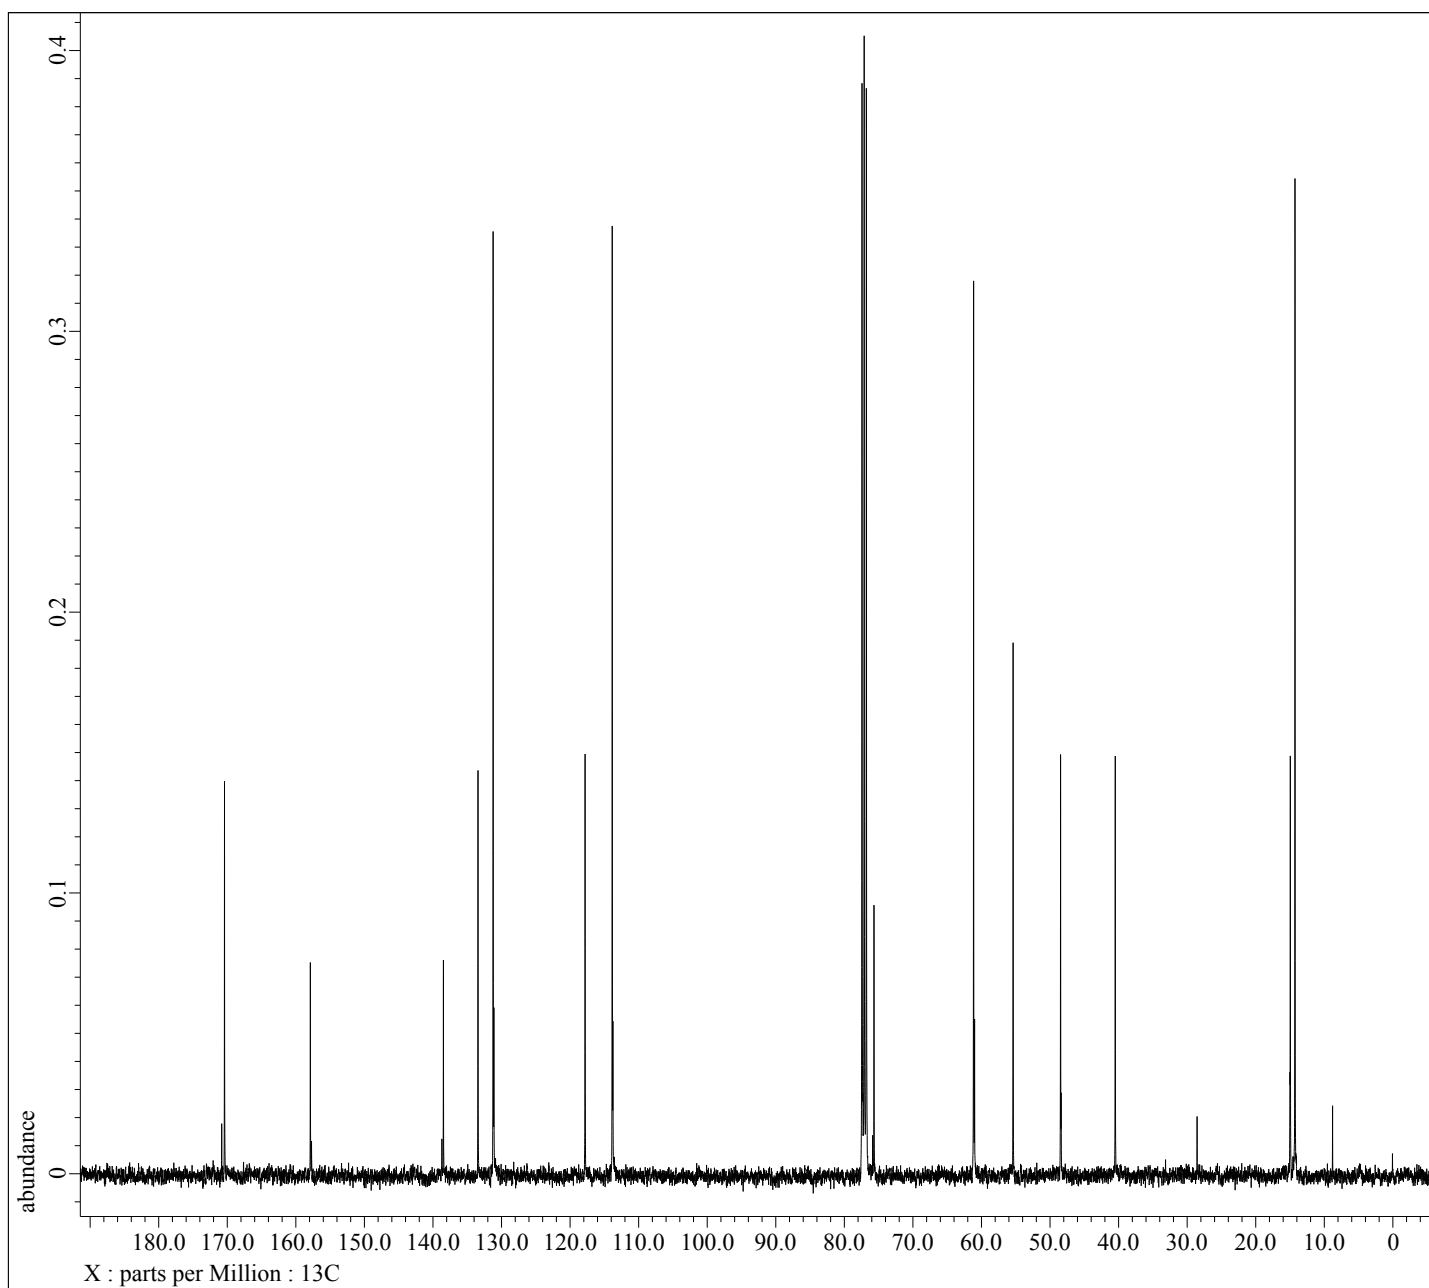

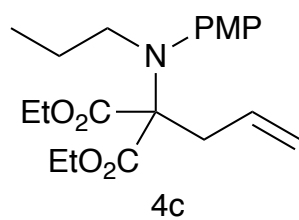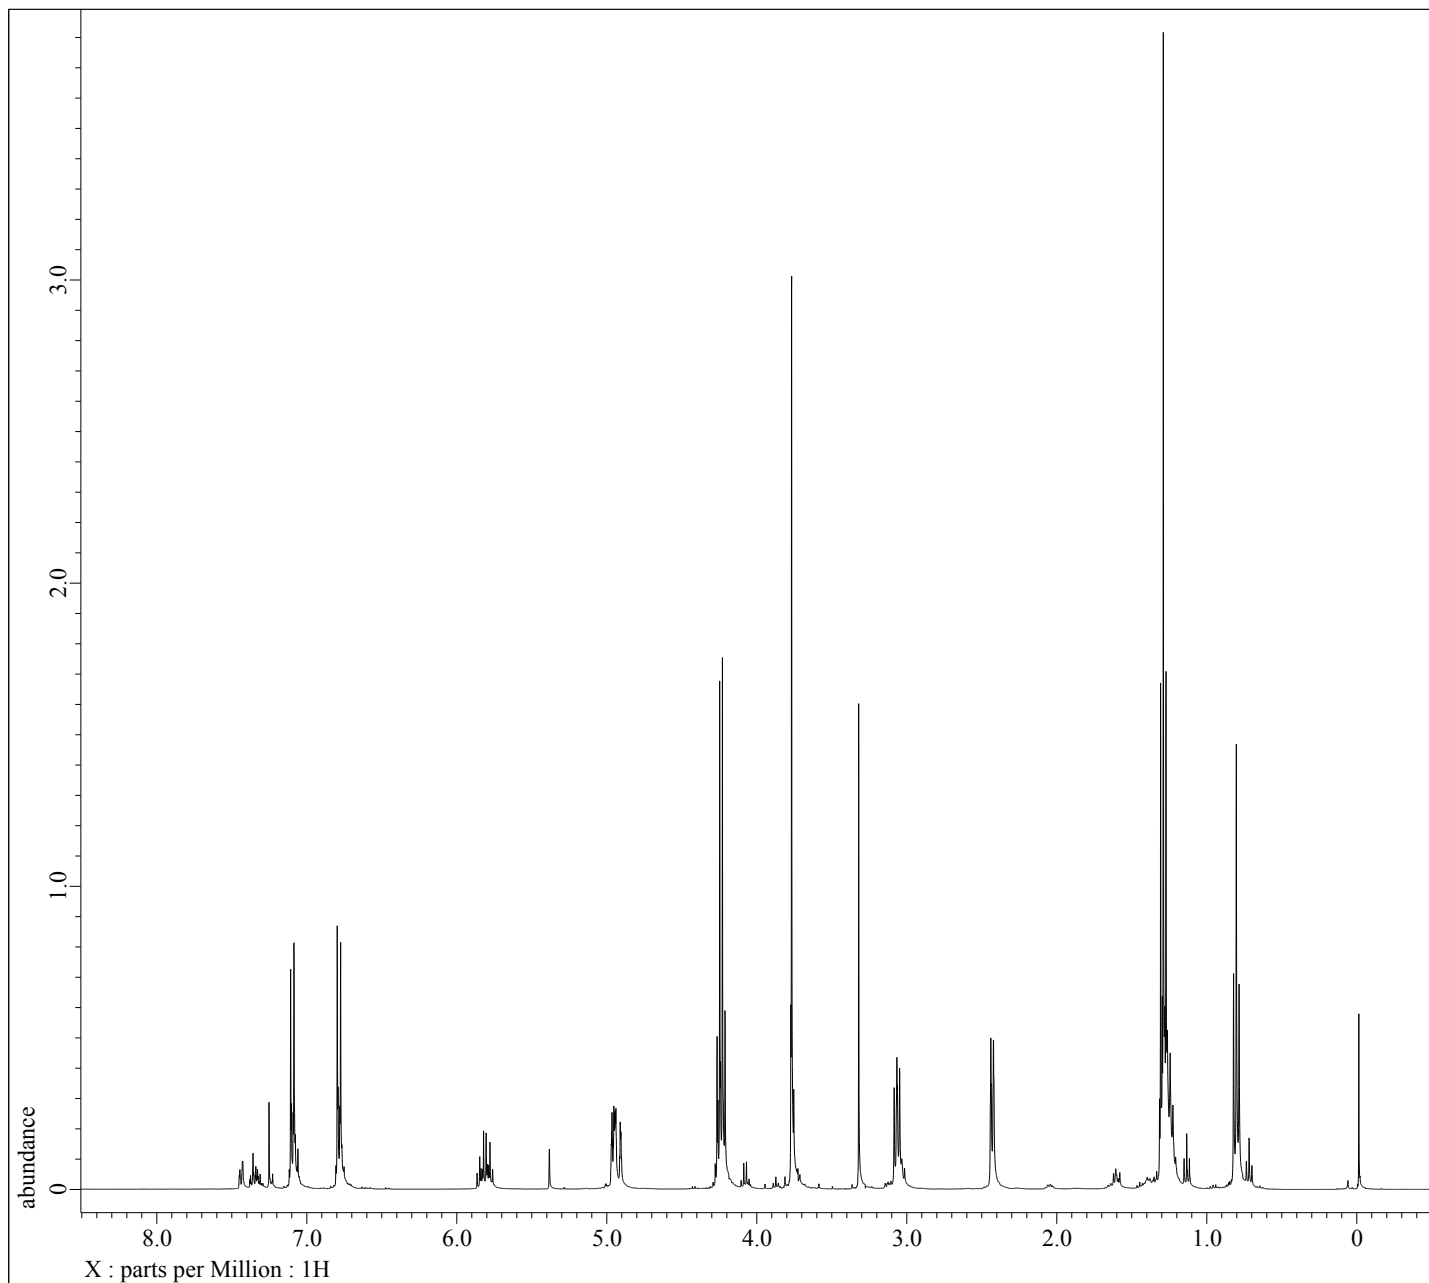



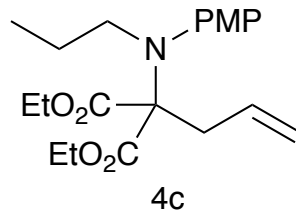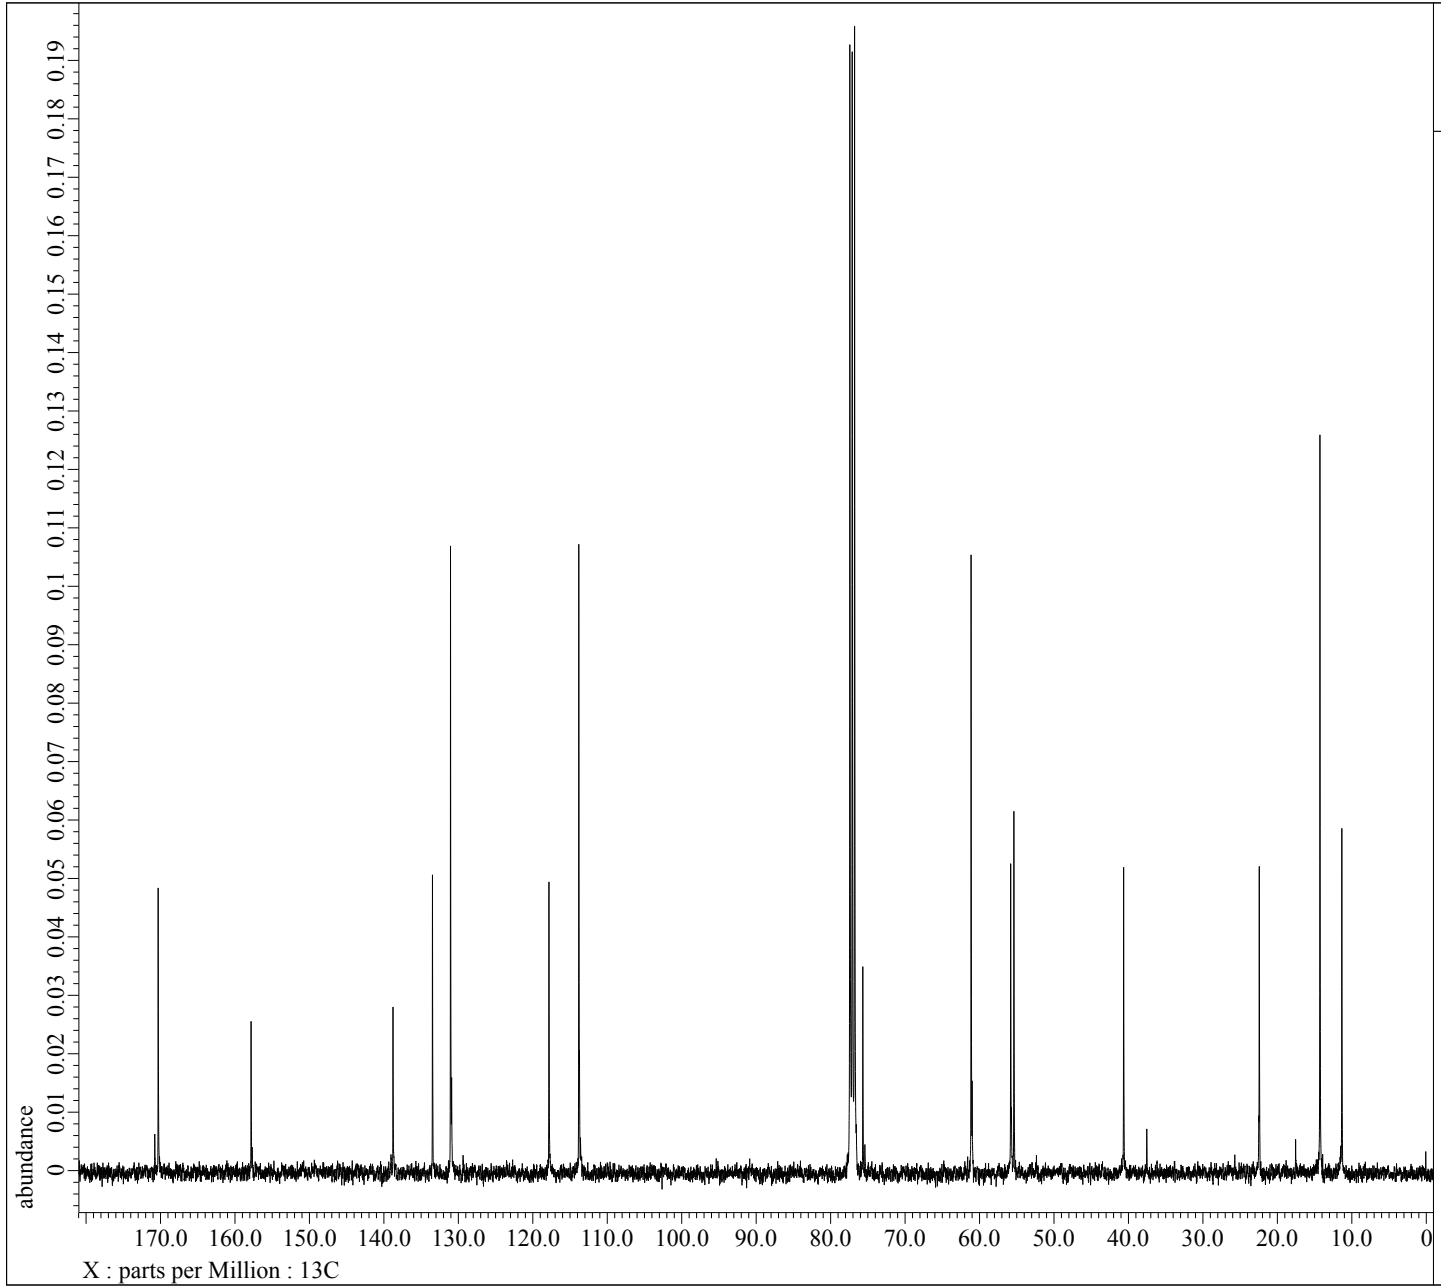

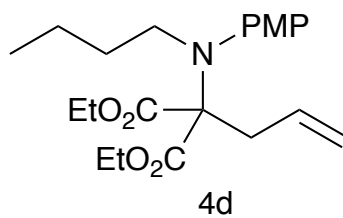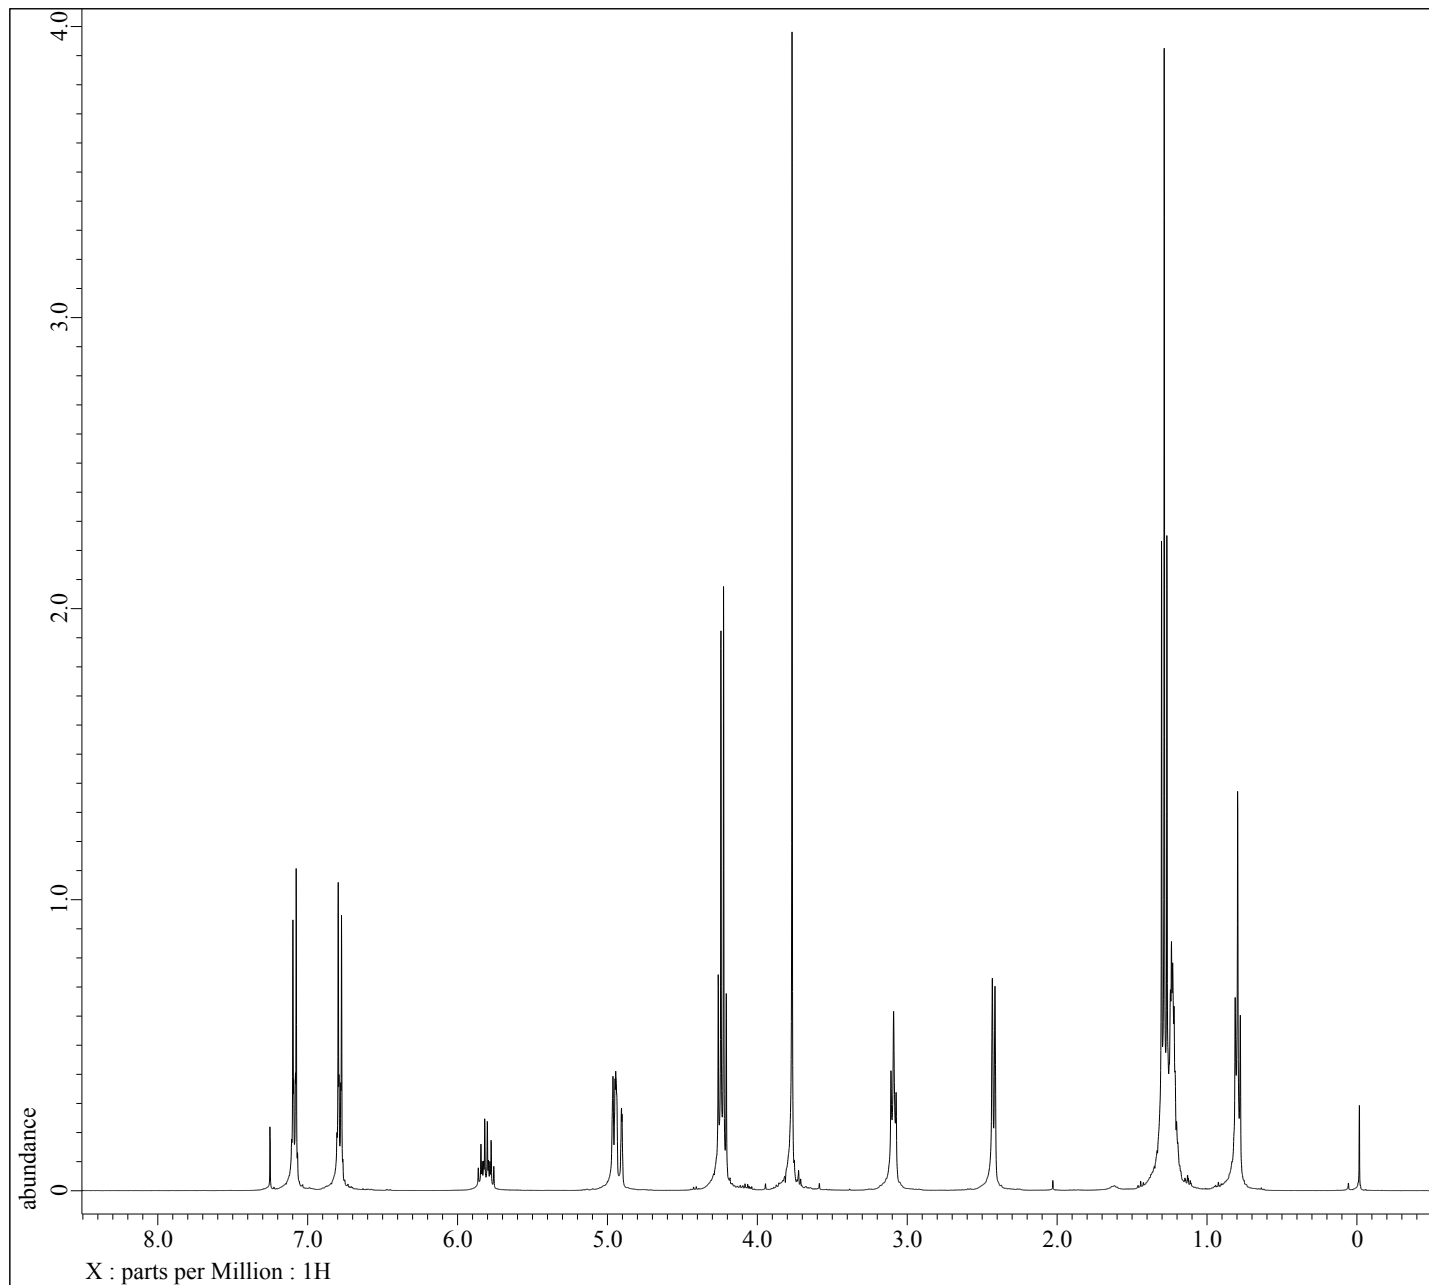

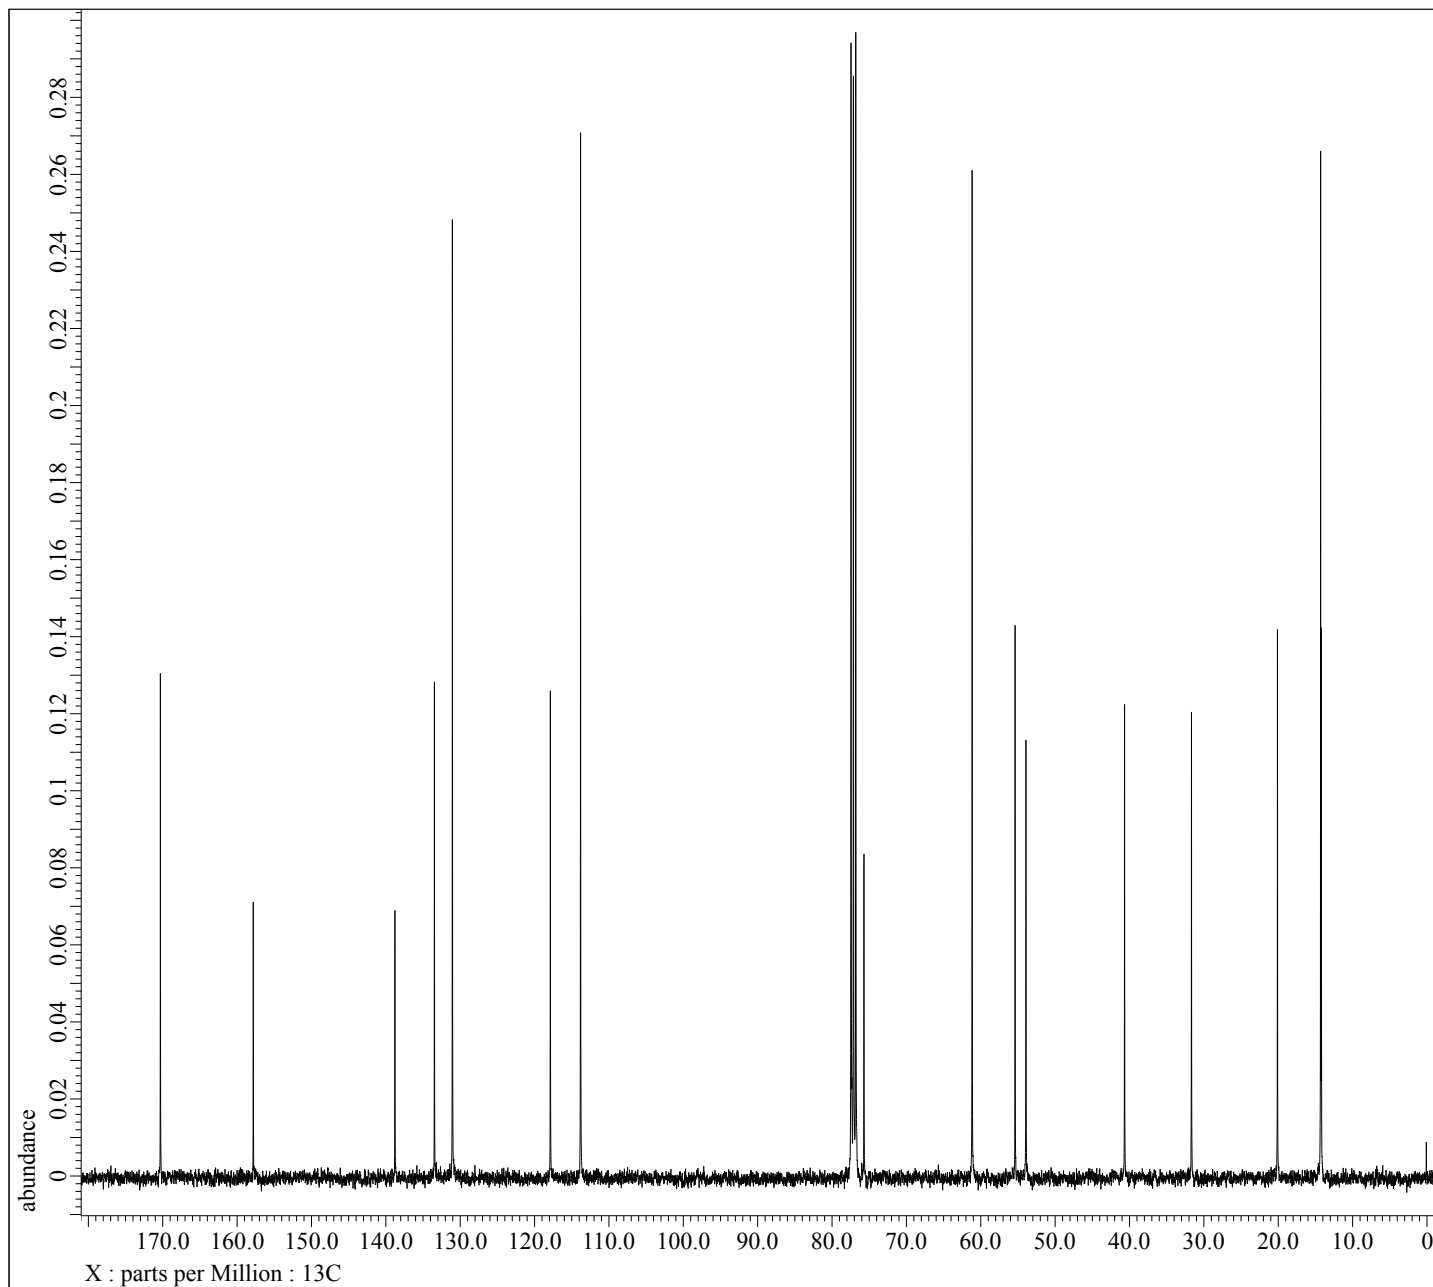

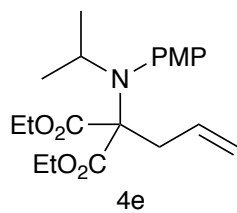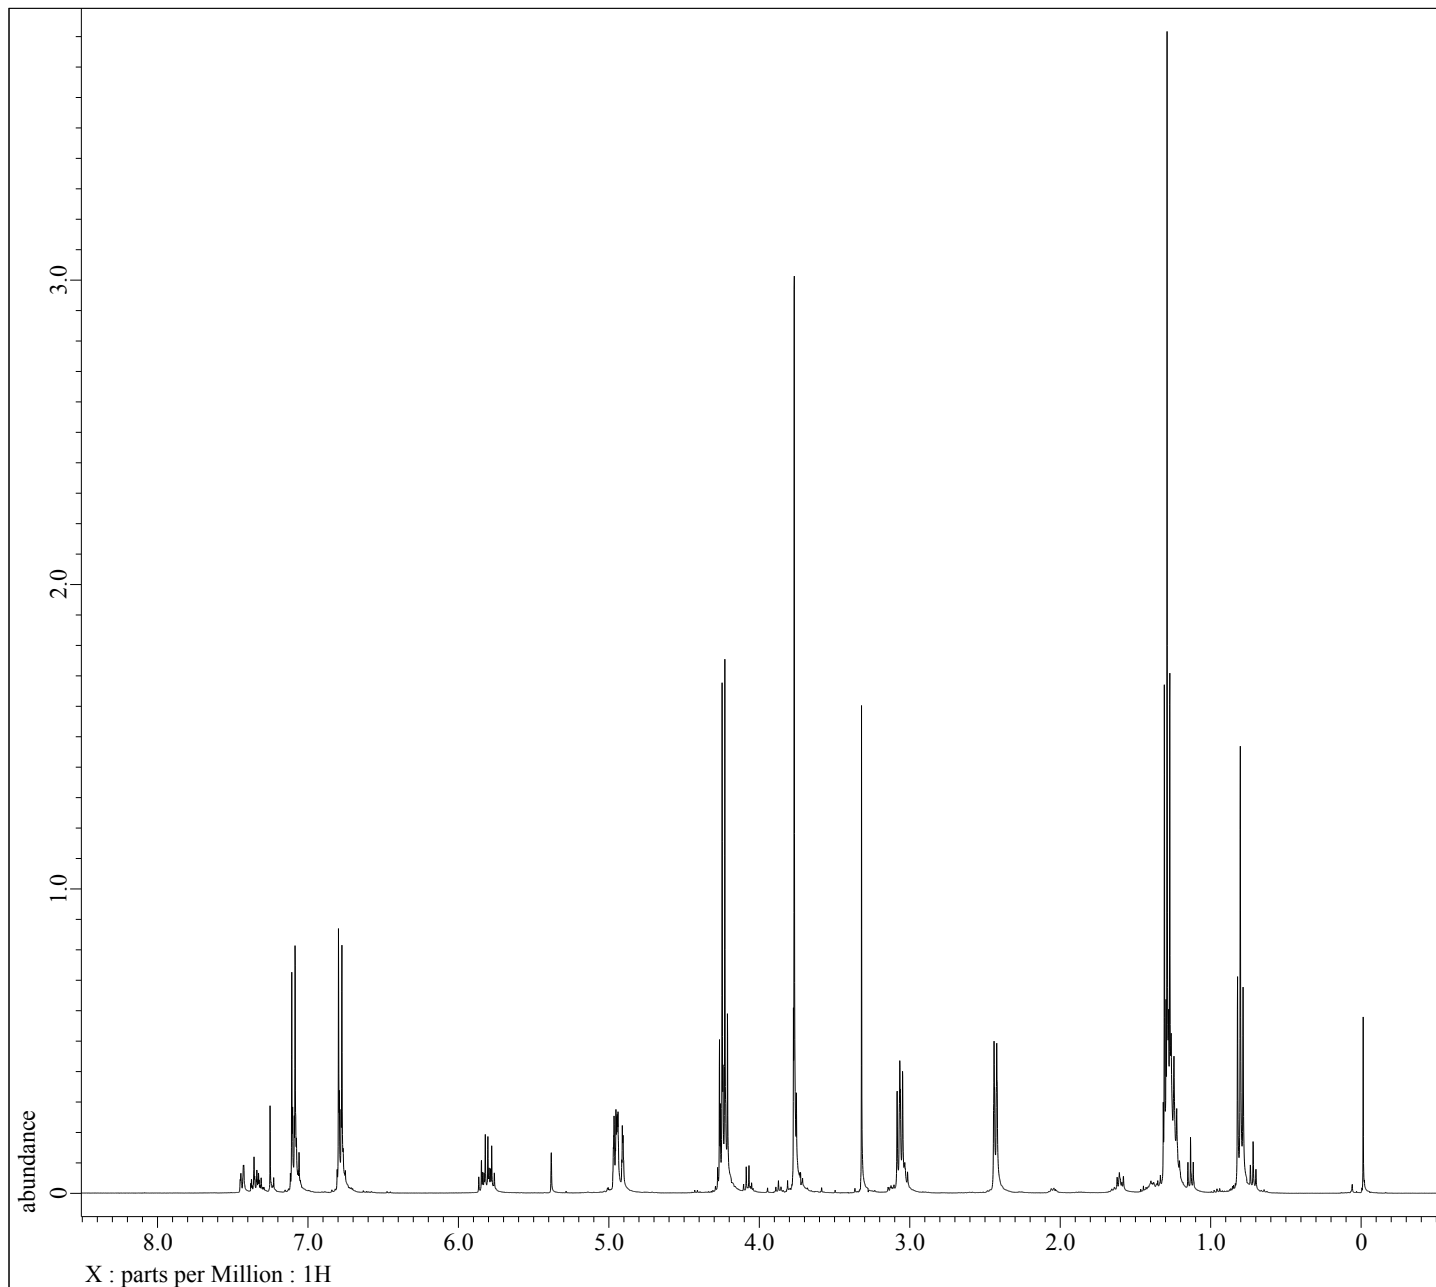

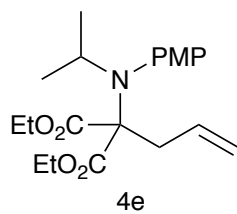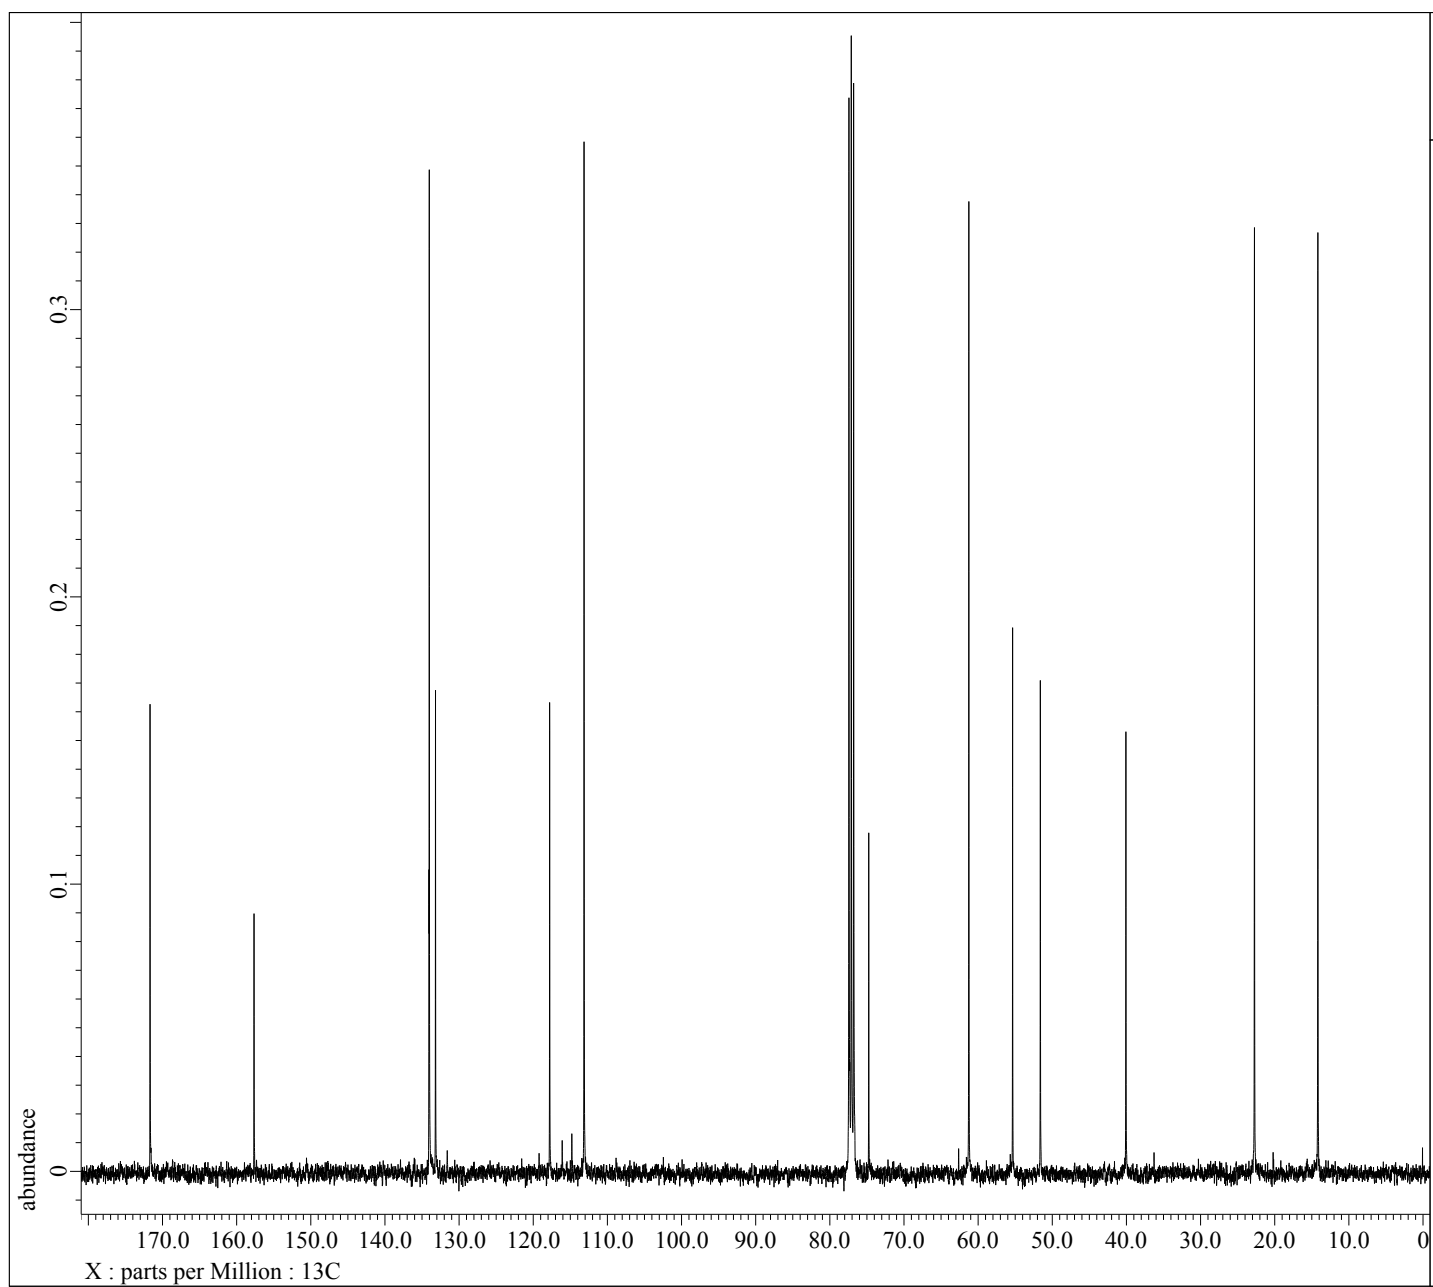

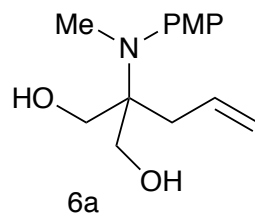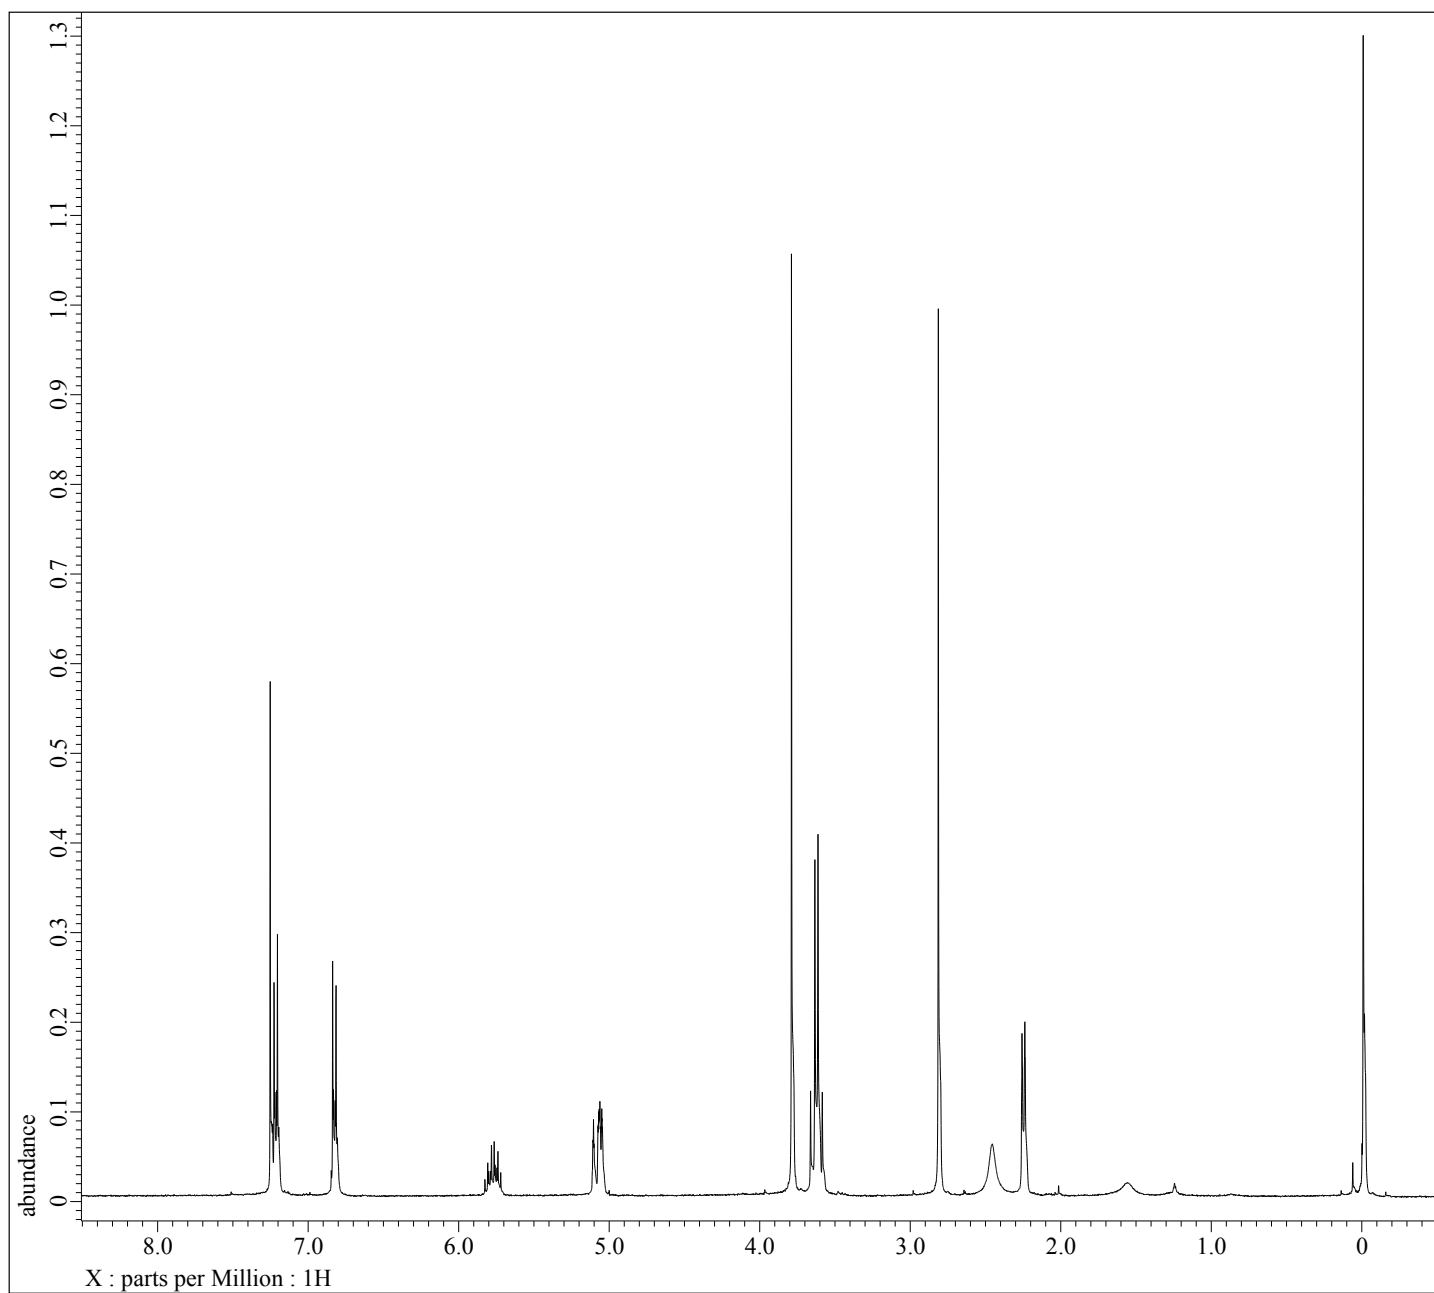

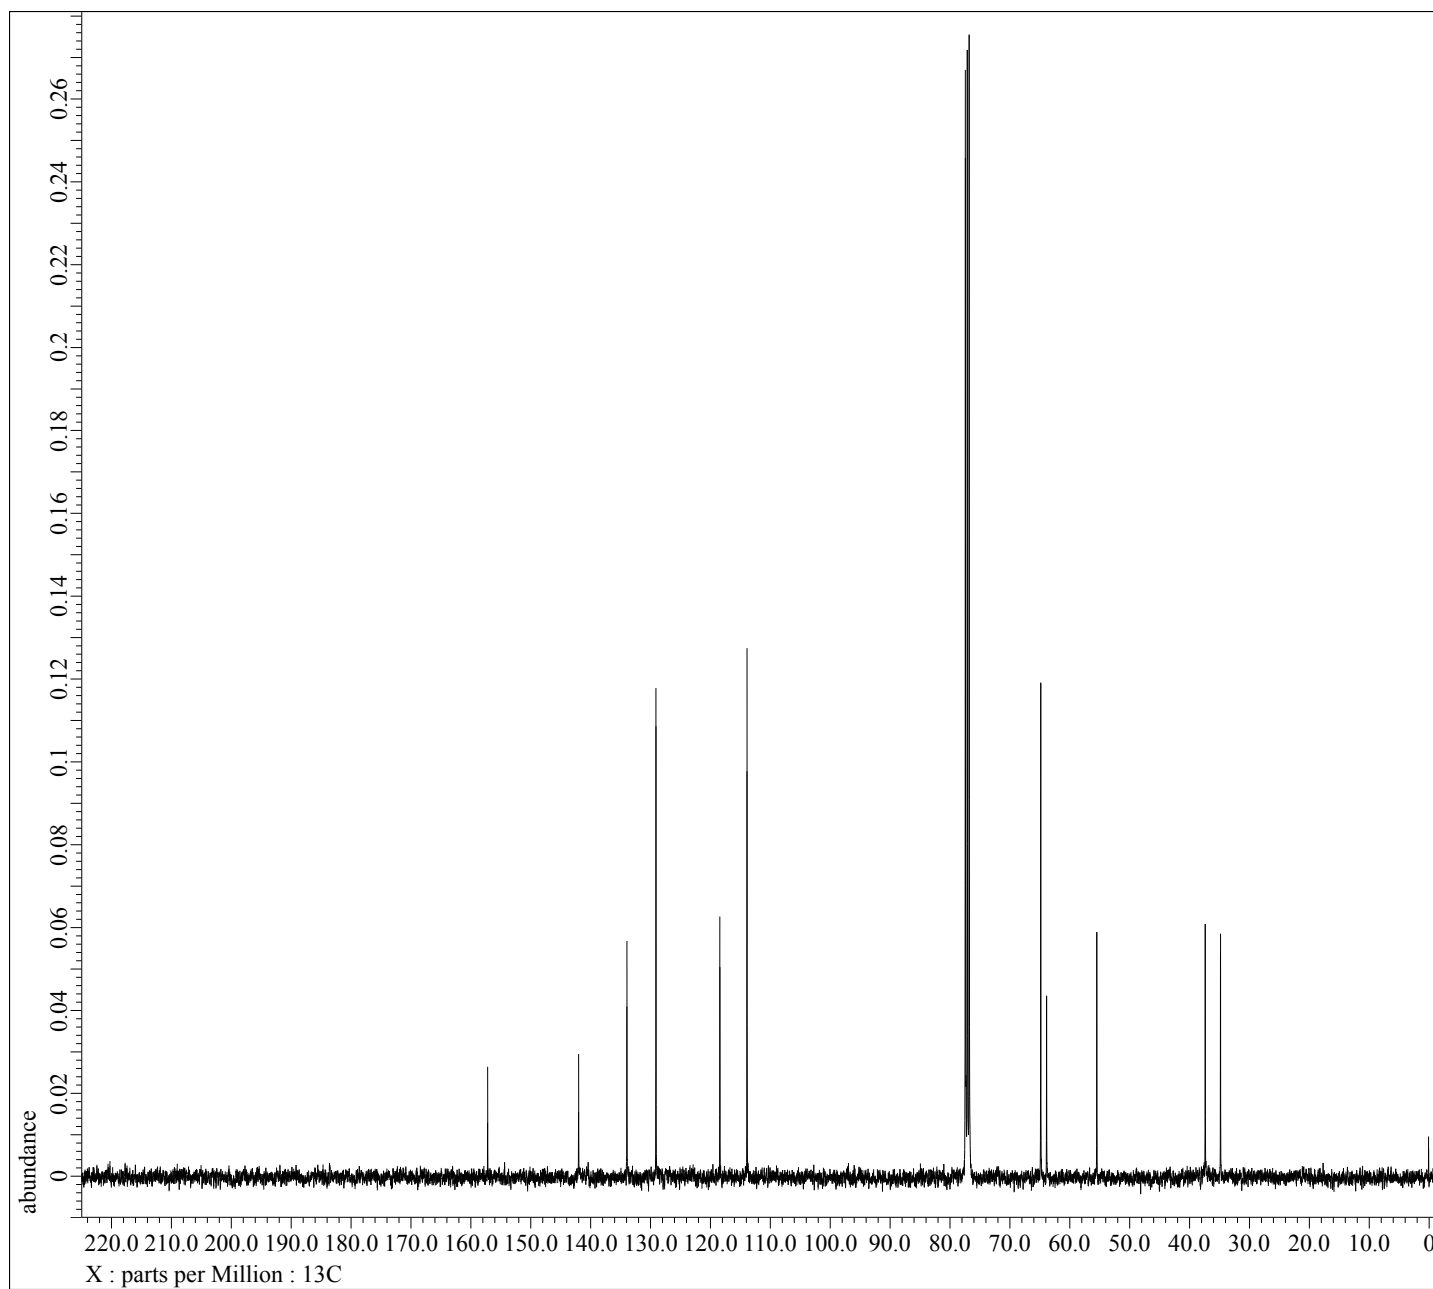

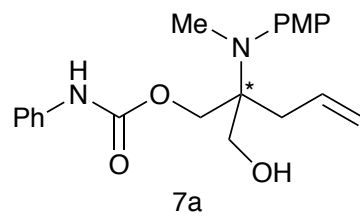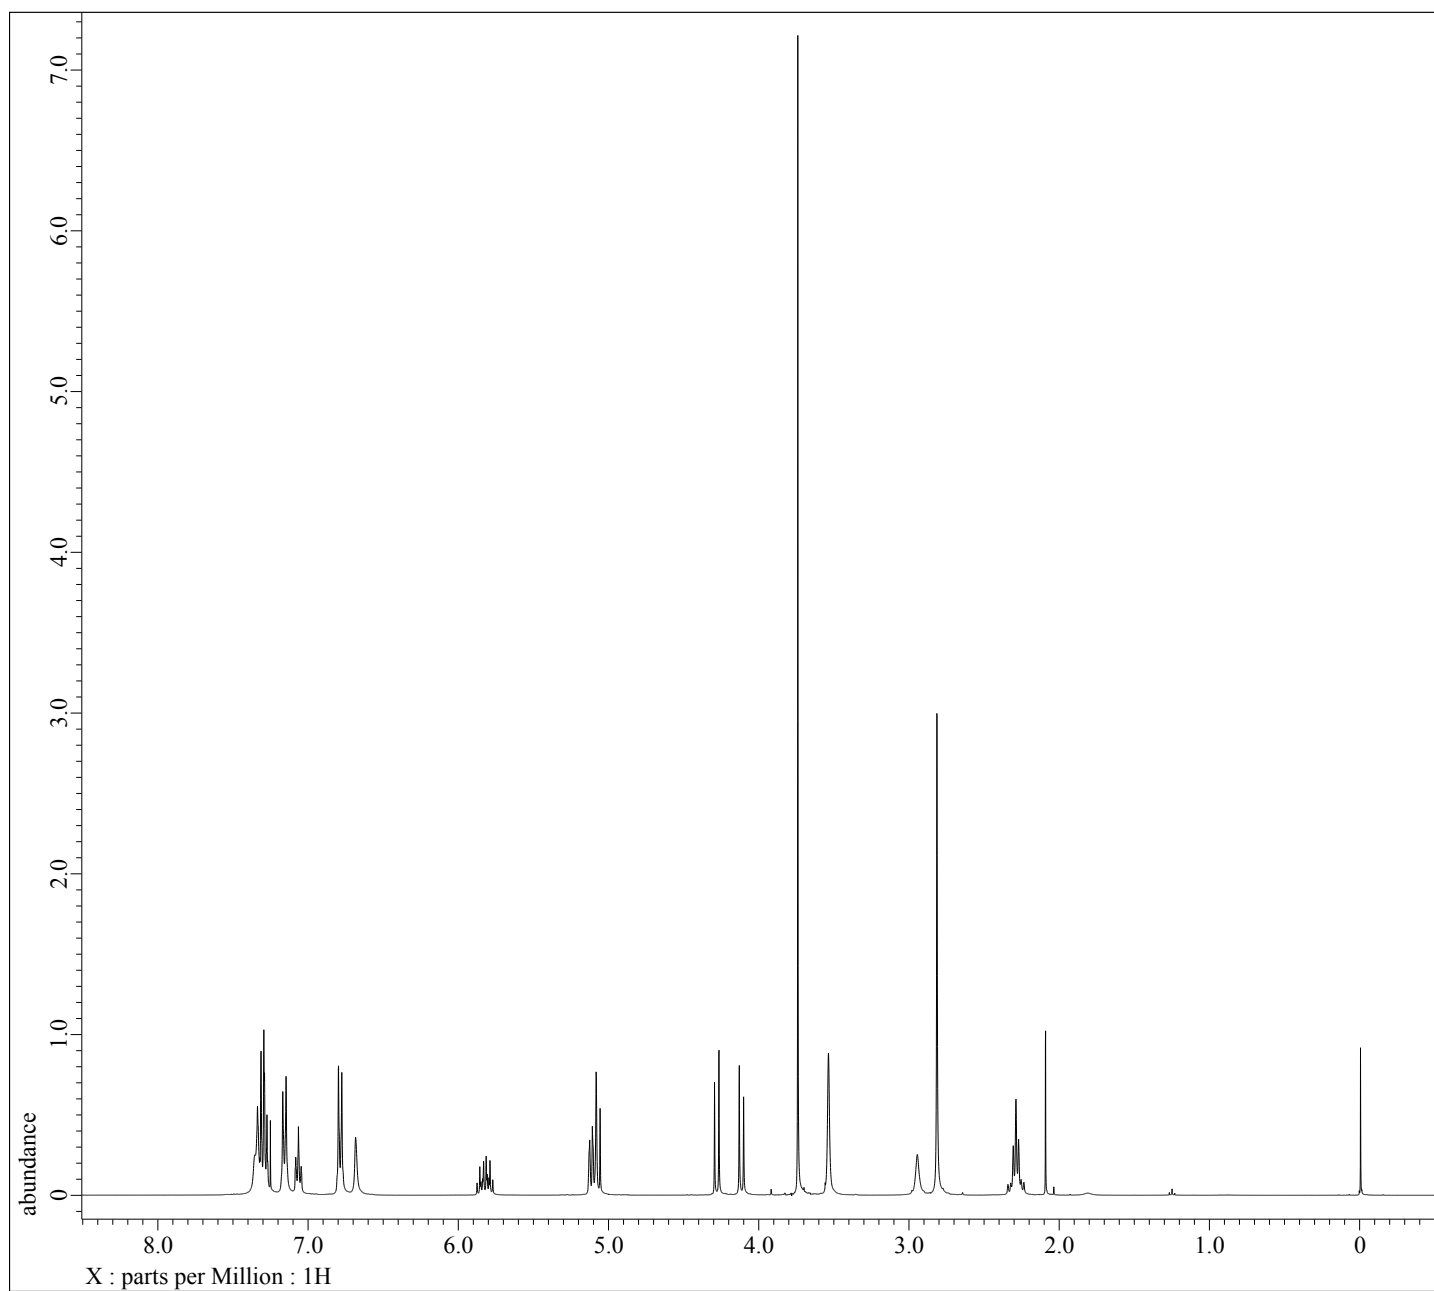



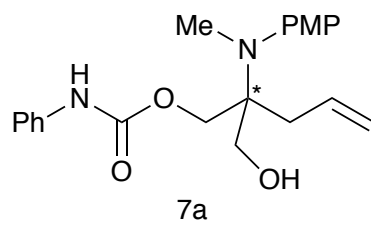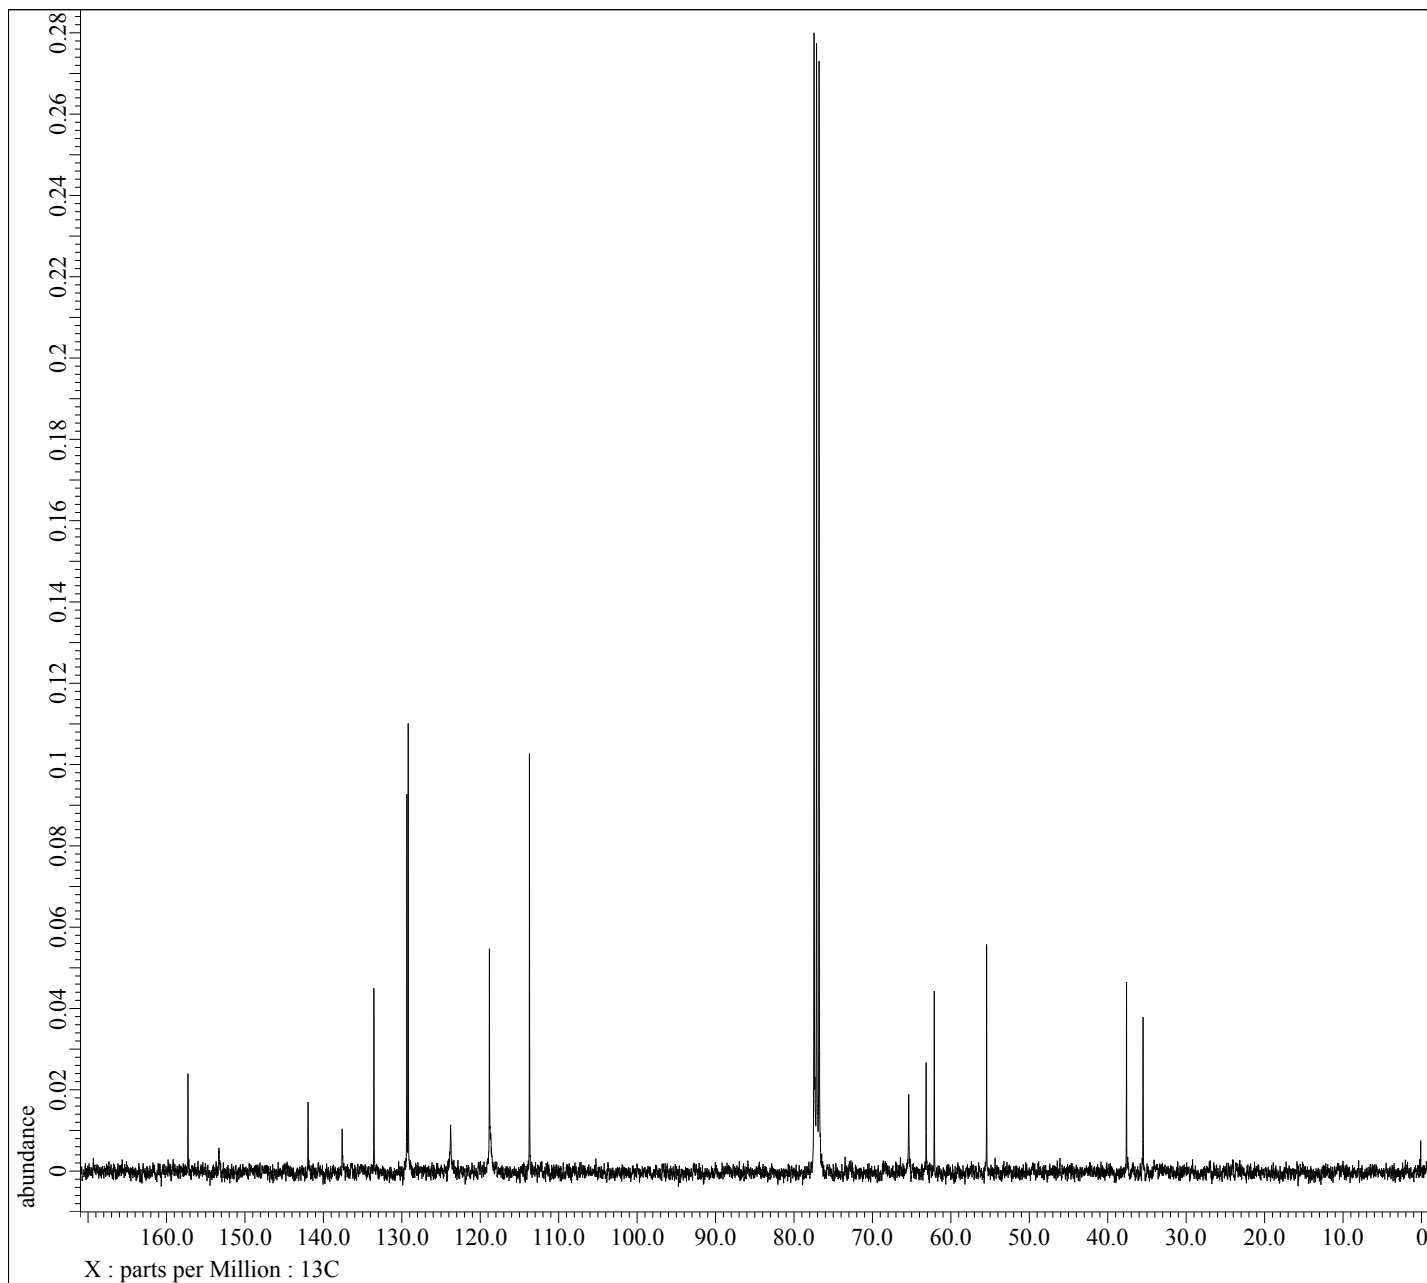

Supplement: c9ra04889h1.pdf [file c9ra04889h1.pdf]
